# Supplementary material for: Phosphoproteomics-directed manipulation reveals SEC22B as a hepatocellular signaling node governing metabolic actions of glucagon
Source: PubMed Central journal article supplement — Nat Commun. 2024 Sep 27;15:8390. doi: 10.1038/s41467-024-52703-w (PMC11436942; doi:10.1038/s41467-024-52703-w), 2024-09-27
Supplement: 41467_2024_52703_MOESM1_ESM.pdf [file 41467_2024_52703_MOESM1_ESM.pdf]

### Figure S1

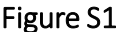

### Supplementary Figure 1 (related to Figure 1).

a: Liver glycogen content of male Sprague Dawley rats treated with either vehicle (VEH) or glucagon (GCG) (1.15 nM) for 2, 8 and 32min (n = 4 rats per group) *in situ*. Data presented as mean  $\pm$  s.e.m. Statistical tests used were two-way ANOVA with Holm-Sidak post-hoc tests. Dotted line indicates a main effect. Difference in treatment: \* $P$  <0.05, \*\* $P$  <0.01, \*\*\* $P$  <0.001; Difference in time: # $P$  <0.05, ## $P$  <0.01, ### $P$  <0.001.

b: Western blot quantification of liver phospho-PKA motif protein expression of rat liver as in a.

c: Western blot images of liver phospho-CREB (S133) level of samples as in a.

d: Western blot quantification of c. Samples were obtained from the same experiment, and blots were processed simultaneously.

e: Bubble plot of predicated kinase activation from phosphoproteomics data.

f: Western blot images of phospho-protein kinase A (pPKA) motif protein substrates, phospho-CREB (S133) and loading control vinculin (VCL) of SNU398-GCGR cells treated with either vehicle (VEH) or glucagon (GCG) (1 nM) for 30min (n = 4 per group).

g-h: Western blot quantification of e. Data were analysed by unpaired two-tailed Student's t-test. Difference in treatment: \*\*\* $P$  <0.001. Samples were obtained from the same experiment, and blots were processed simultaneously.

Source data are provided as a Source Data file.

Figure S2

| kinase | kinase group | site percentile | percentile rank |
|--------|--------------|-----------------|-----------------|
| MEKK1  | STE          | 97.056 %        | 1               |
| YANK2  | AGC          | 96.846 %        | 2               |
| PRPK   | Other        | 96.492 %        | 3               |
| ZAK    | TKL          | 96.221 %        | 4               |
| YANK3  | AGC          | 95.983 %        | 5               |
| NEK11  | Other        | 95.717 %        | 6               |
| MEKK3  | STE          | 95.708 %        | 7               |
| BCKDK  | PDHK         | 95.116 %        | 8               |
| RSK4   | AGC          | 94.904 %        | 9               |
| COT    | STE          | 93.928 %        | 10              |
| IKKB   | Other        | 93.480 %        | 11              |
| MST4   | STE          | 93.365 %        | 12              |
| DLK    | TKL          | 93.166 %        | 13              |
| PDHK1  | PDHK         | 93.129 %        | 14              |
| IKKE   | Other        | 92.714 %        | 15              |
| TBK1   | Other        | 92.567 %        | 16              |
| CAMKK2 | Other        | 92.220 %        | 17              |
| GSK3B  | CMGC         | 92.109 %        | 18              |
| CAMKK1 | Other        | 91.187 %        | 19              |
| YSK1   | STE          | 91.137 %        | 20              |

**Supplementary Figure 2 (related to Figure 2).**

Table of predicted upstream kinases affecting SEC22B S137 phosphorylation.

Figure S3

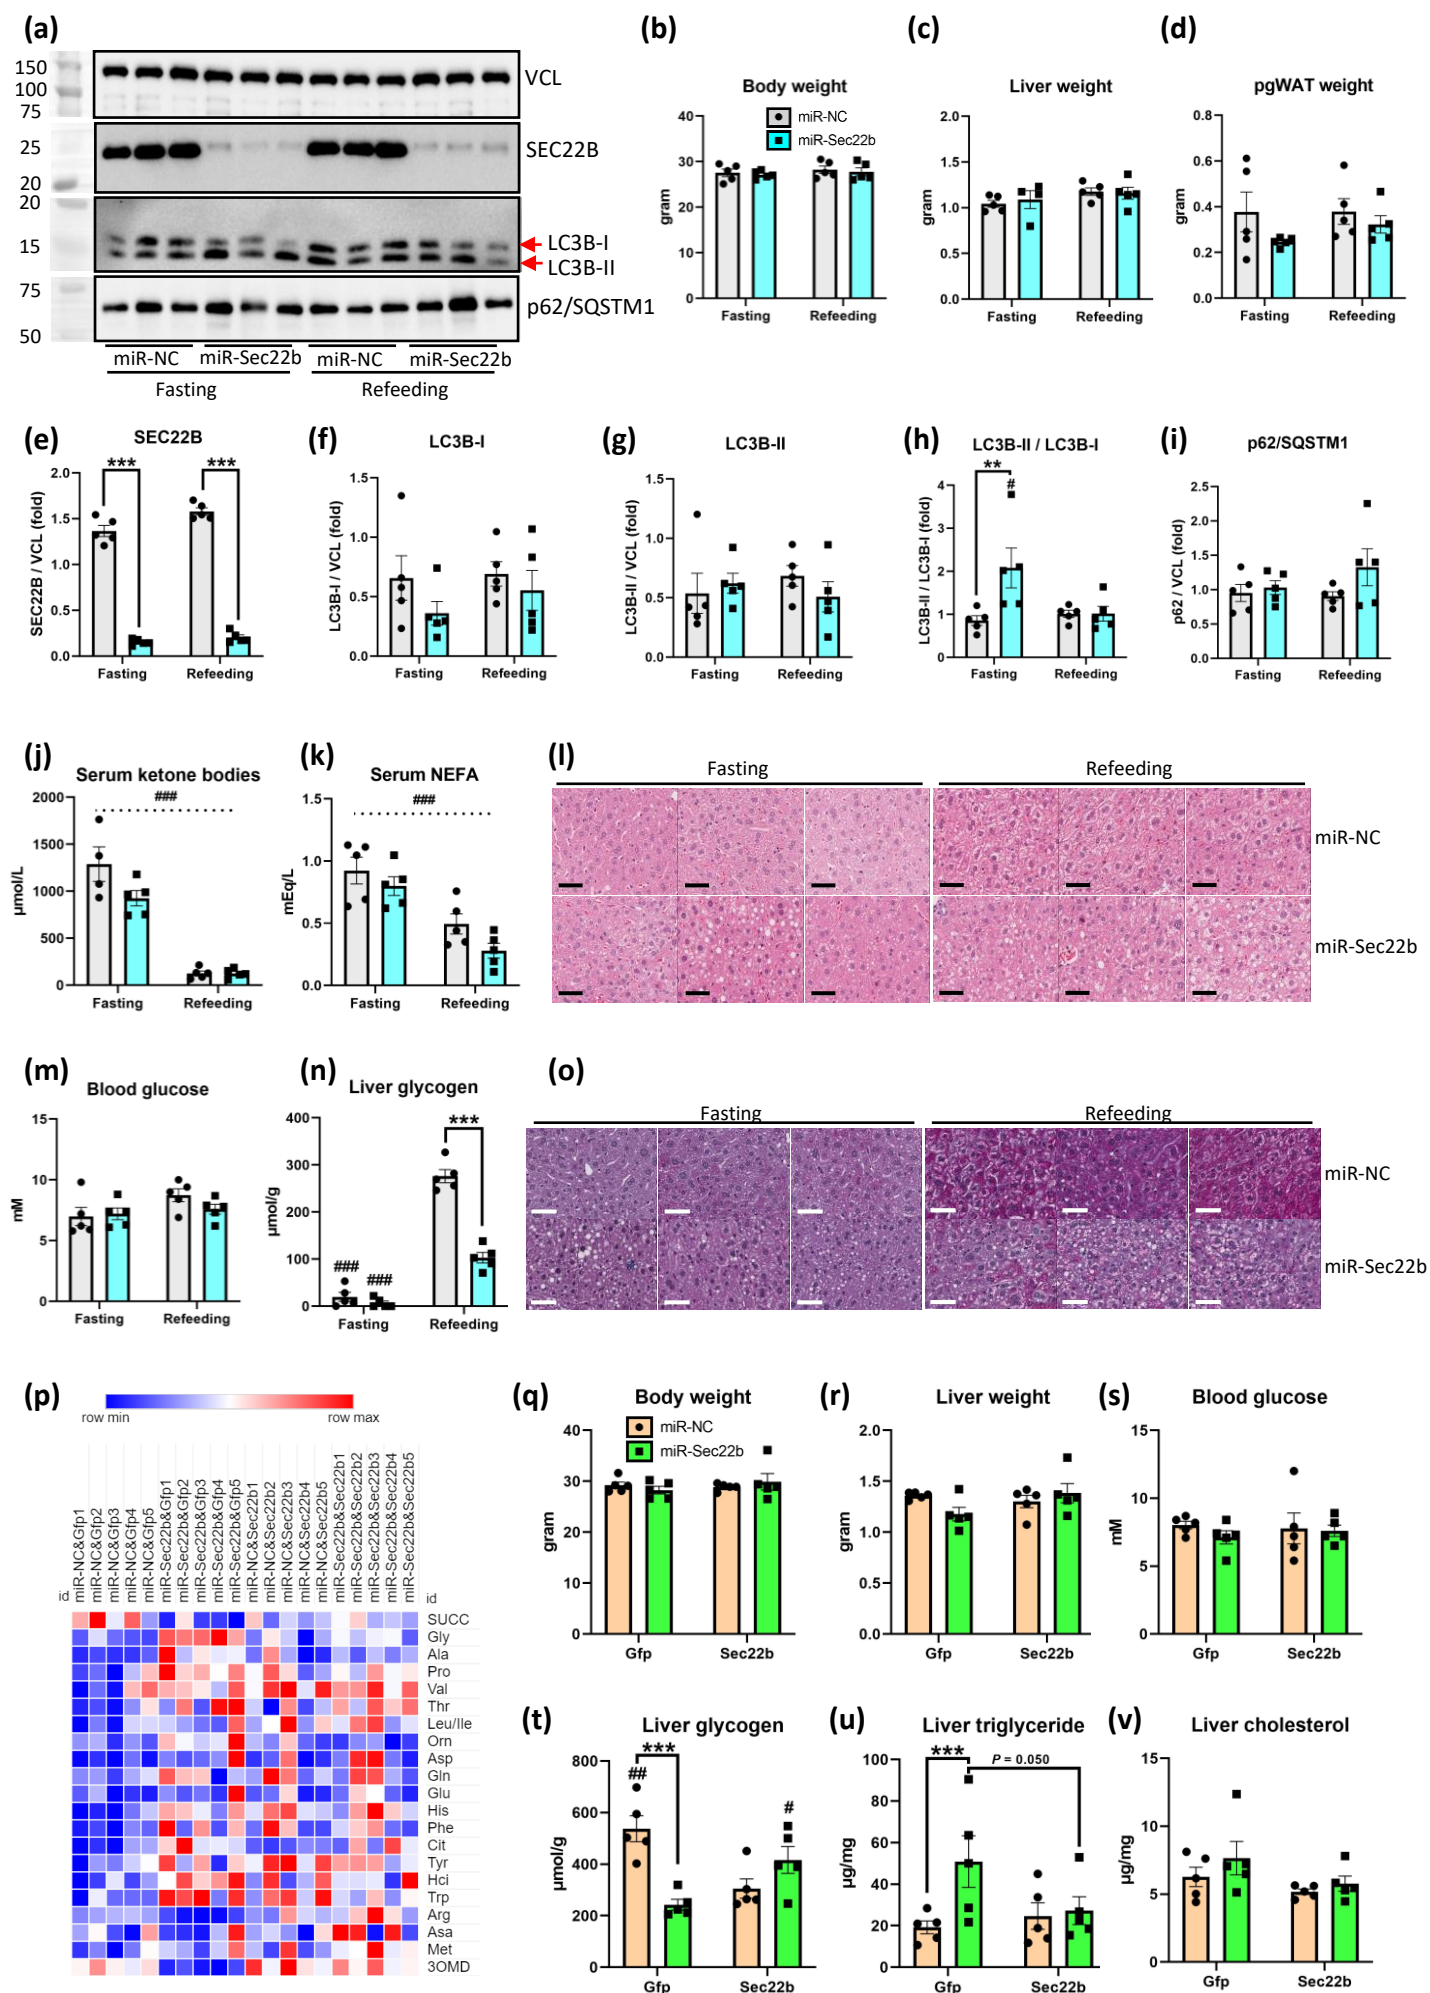

### Supplementary Figure 3 (related to Figure 3).

a: Liver western blot images of SEC22B, LC3, p62/SQSTM1 and loading control vinculin (VCL) levels from male C57Bl/6N mice administered with adeno-associated viruses expressing a microRNA to silence Sec22b (miR-Sec22b) or a negative control (miR-NC) and fasted for 16h (fasting) or fasted and then refed for 5-6h (refeeding).

b: Body weight of mice as in a. Data are mean  $\pm$  s.e.m.; n = 5 mice per group. Statistical tests used were 2-way ANOVA with Holm-Sidak post-hoc tests. Dotted line shows the main effect. Difference between fasting and refeeding: # $P$  < 0.05, ## $P$  < 0.01, ### $P$  < 0.001; Difference between miR-NC and miR-Sec22b: \* $P$  < 0.05, \*\* $P$  < 0.01, \*\*\* $P$  < 0.001.

c: Liver weight of mice (n = 5 mice per group except miR-Sec22b with fasting, n=4).

d: Perigonadal white adipose tissue weight of mice as in a.

e-i: Western blot quantification of a. Samples were obtained from the same experiment, and blots were processed simultaneously.

j: Serum ketone bodies levels of mice as in a.

k: Serum non-esterified fatty acid (NEFA) levels of mice as in a.

l: Liver Hematoxylin and Eosin staining micrographs of mice as in a. Images are representative of three individual mice per group. Scale bar: 50 $\mu$ m.

m: Blood glucose levels of mice as in a.

n: Liver glycogen levels of mice as in a.

o: Mouse liver periodic acid-Schiff (PAS) staining micrographs as in a. Images are representative of three individual mice per group. Scale bar: 50 $\mu$ m.

p: A heatmap of serum amino acid species of male C57Bl/6N mice administered with adeno-associated viruses expressing a microRNA to silence Sec22b (miR-Sec22b) or a negative control (miR-NC), with Flag-tagged Sec22b cDNA (Sec22b) or a control (Gfp), these mice are fasted and then refed for 5-6h. Abbreviations for serum amino acids are provided in Supplementary File 5.

q: Body weight of mice as in p. Data are mean  $\pm$  s.e.m.; n = 5 mice per group. Statistical tests used were 2-way ANOVA with Holm-sidak post-hoc tests. Difference in AAV-miR (miR-NC and miR-Sec22b): \* $P$  < 0.05, \*\* $P$  < 0.01, \*\*\* $P$  < 0.001; Difference in AAV-cDNA (GFP and WT): # $P$  < 0.05, ## $P$  < 0.01, ### $P$  < 0.001.

r: Liver weight of mice as in p.

s: Blood glucose levels of mice as in p.

t: Liver glycogen levels of mice as in p.

u: Liver triglyceride levels of mice as in p.

v: Liver cholesterol levels of mice as in p.

Source data are provided as a Source Data file.

Figure S4

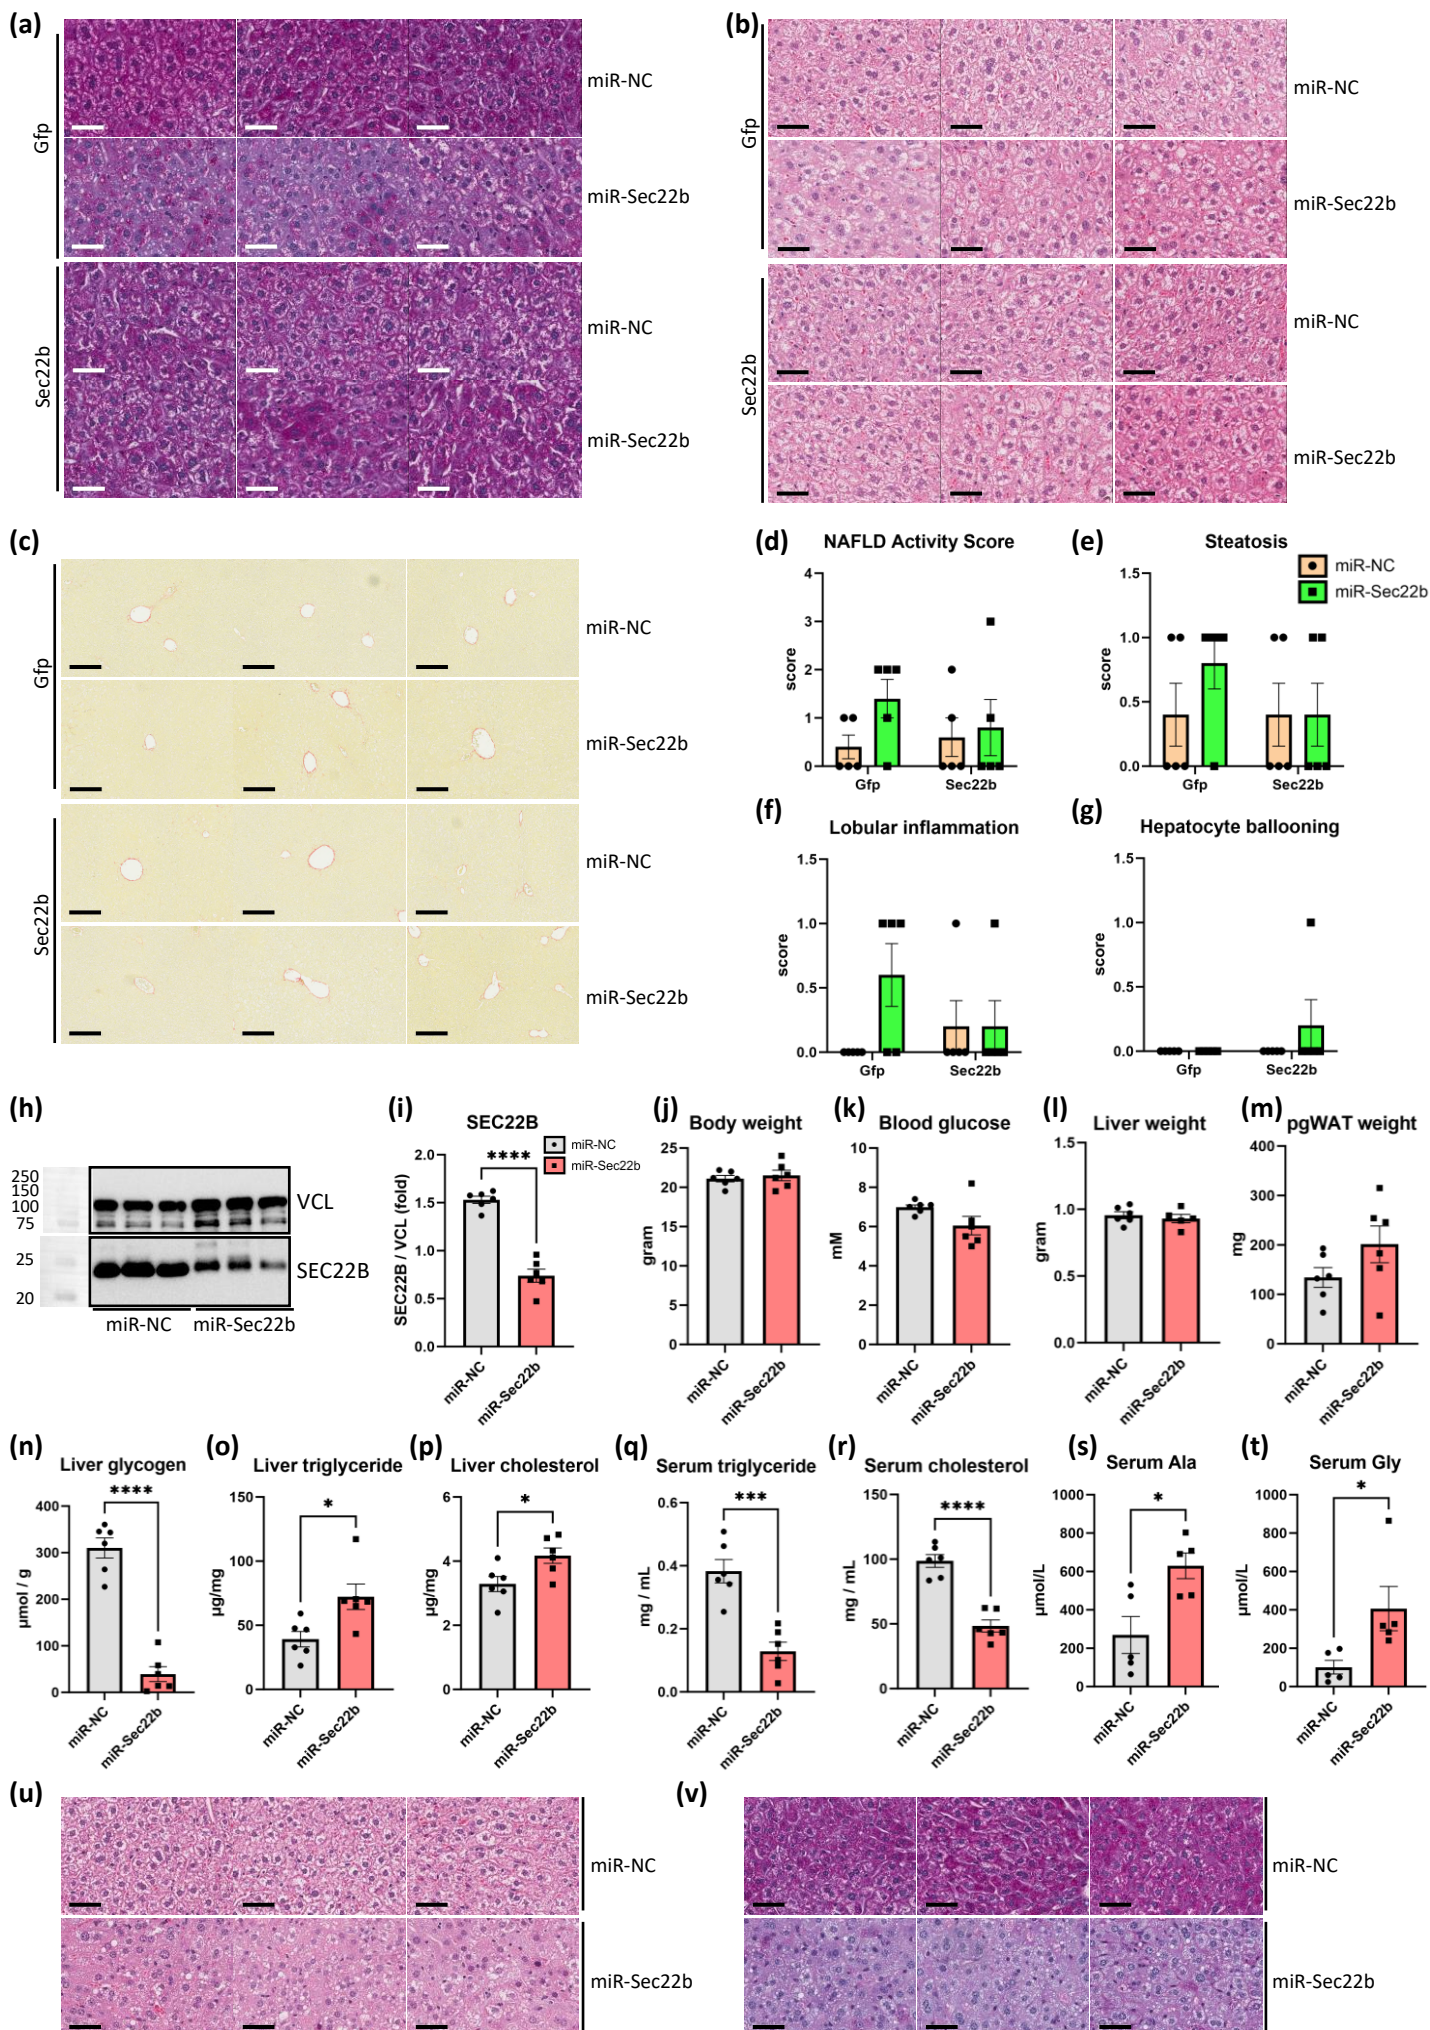

**Supplementary Figure 4 (related to Figure 3).**

a: Liver PAS staining micrographs of male C57Bl/6N mice administered with adeno-associated viruses expressing a microRNA to silence Sec22b (miR-Sec22b) or a negative control (miR-NC), with Flag-tagged Sec22b cDNA (Sec22b) or a control (Gfp), these mice are fasted and then refed for 5-6h. Images are representative of three individual mice per group. Scale bar: 50µm.

b: Liver Hematoxylin and Eosin staining micrographs of mice as in a. Images are representative of three individual mice per group. Scale bar: 50µm.

c: Liver picrosirius red (PSR) staining micrographs of mice as in a. Images are representative of three individual mice per group. Scale bar: 200µm.

d: NAFLD Activity Score of micrographs as in b. Data are mean  $\pm$  s.e.m.; n = 5 mice per group.

e: Steatosis Score of micrographs as in b.

f: Lobular Inflammation Score of micrographs as in b.

g: Hepatocyte Ballooning Score of micrographs as in b.

h: Liver western blot images of SEC22B and loading control vinculin (VCL) levels of female C57Bl/6N mice administered with adeno-associated viruses expressing a microRNA to silence Sec22b (miR-Sec22b) or a negative control (miR-NC) and fasted for 16h then refed for 5-6h.

i: Western blot quantification of h. Samples were obtained from the same experiment, and blots were processed simultaneously. Data are mean  $\pm$  s.e.m.; n = 6 mice per group. Statistical tests used were unpaired two-sided Student's *t*-tests. Difference between miR-NC and miR-Sec22b: \**P* < 0.05, \*\**P* < 0.01, \*\*\**P* < 0.001, \*\*\*\**P* < 0.0001.

j: Body weight of mice as in h.

k: Blood glucose of mice as in h.

l: Liver weight of mice (n = 6 for miR-NC group and n = 5 for miR-Sec22b group).

m: pgWAT weight of mice as in h.

n: Liver glycogen of mice as in h.

o: Liver triglyceride of mice as in h.

p: Liver cholesterol of mice as in h.

q: Serum triglyceride of mice as in h.

r: Serum cholesterol of mice as in h.

s: Serum alanine of mice as in h.

t: Serum glycine of mice as in h.

u: Liver Hematoxylin and Eosin staining micrographs of mice as in h. Images are representative of three individual mice per group. Scale bar: 50µm.

v: Liver periodic acid-Schiff (PAS) staining micrographs of mice as in h. Images are representative of three individual mice per group. Scale bar: 50µm. Source data are provided as a Source Data file.

Figure S5

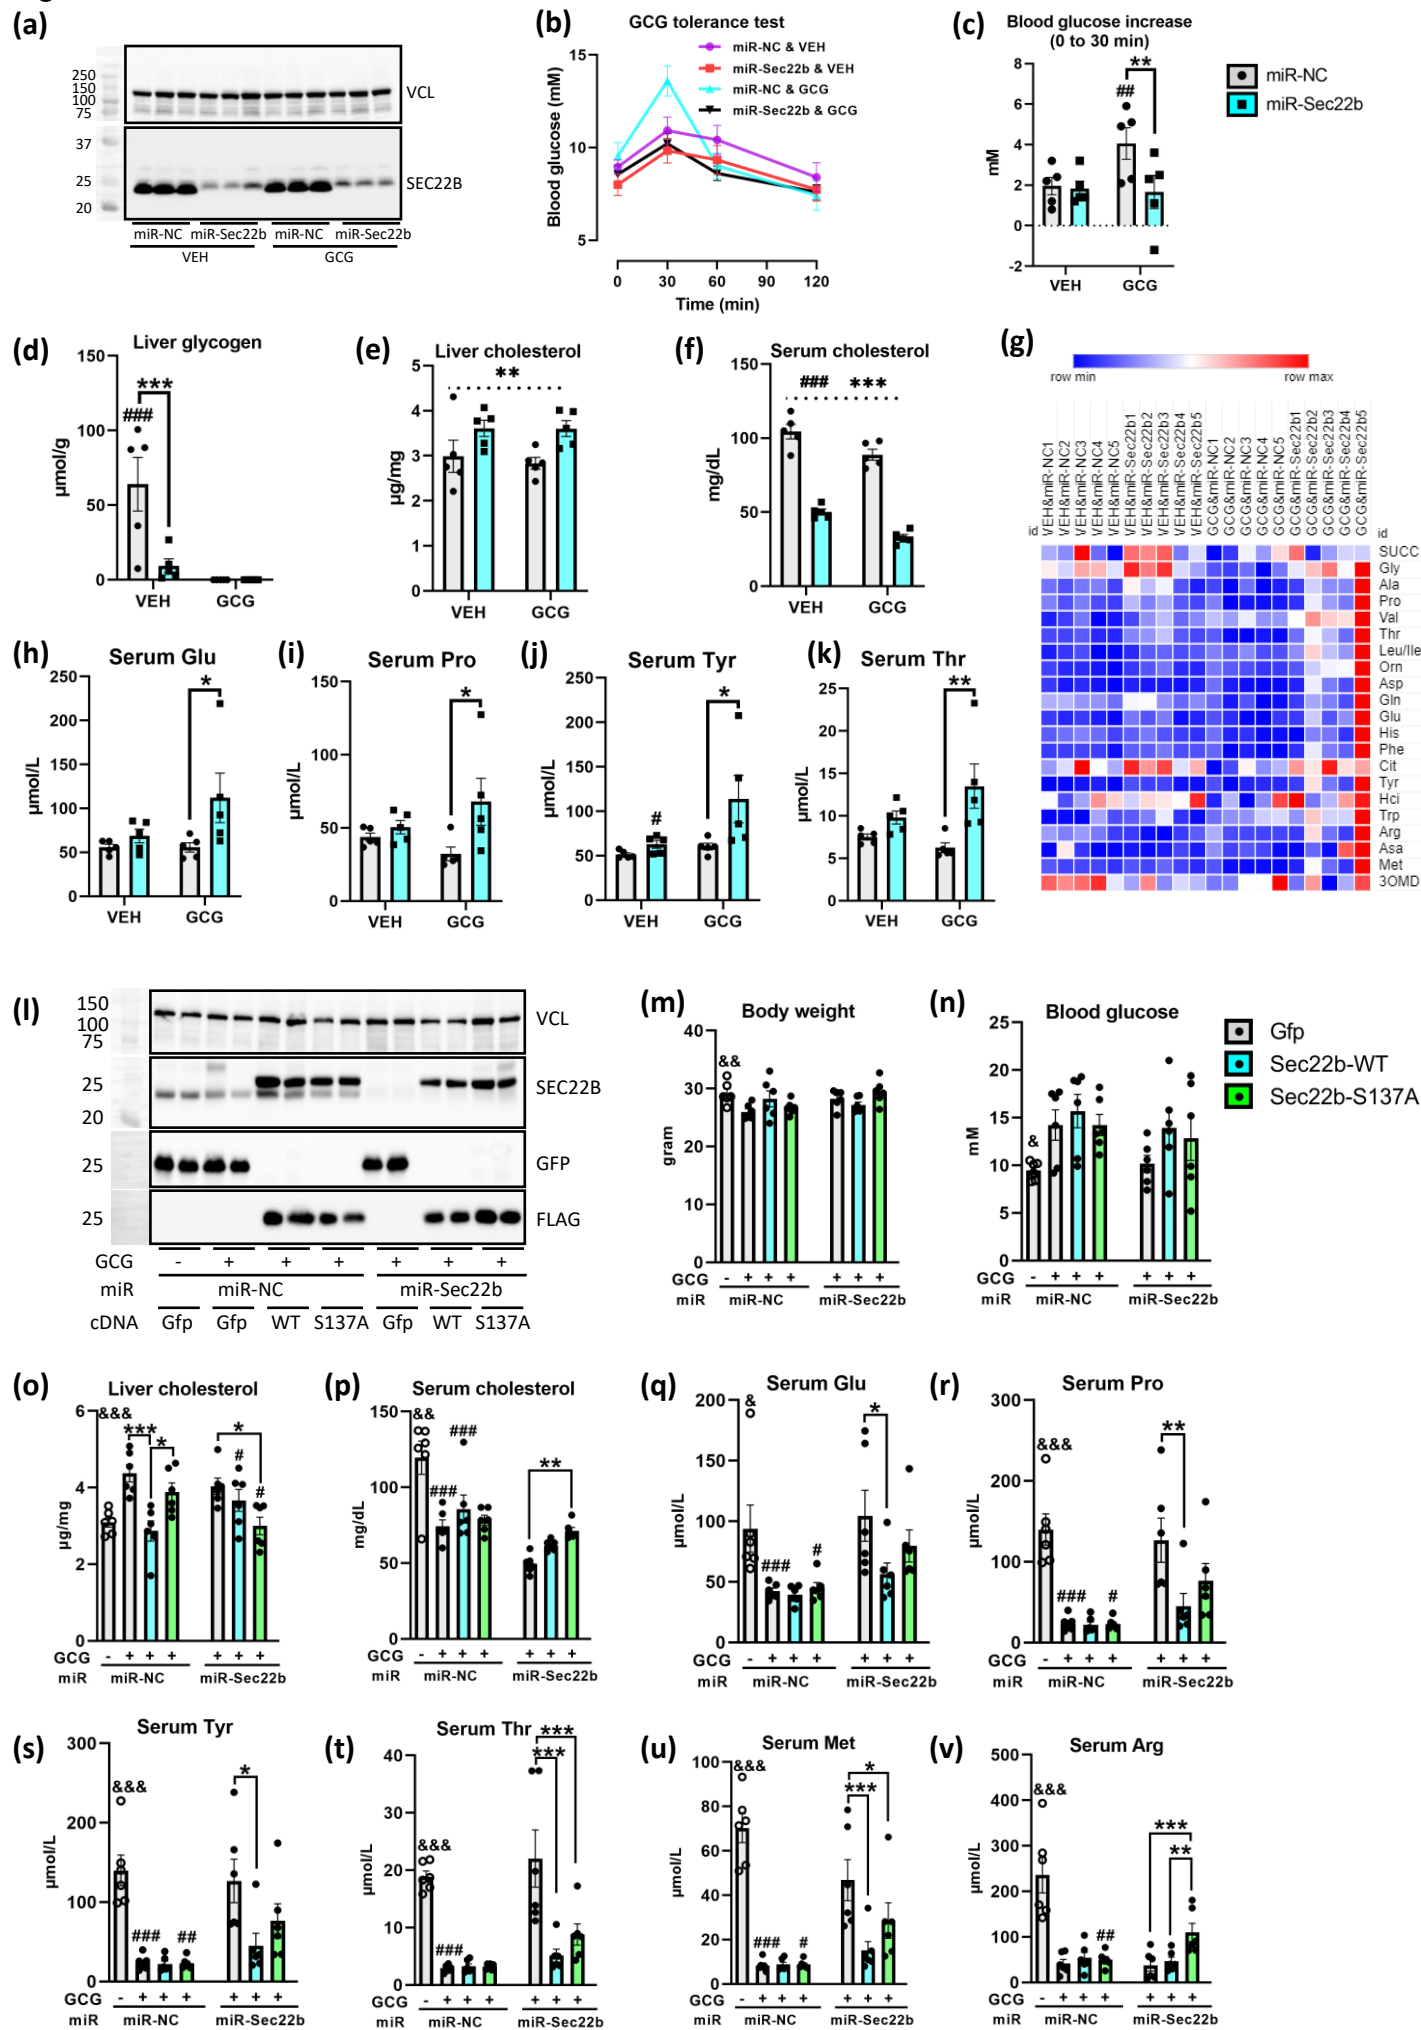

### Supplementary Figure 5 (related to Figure 4).

a: Liver western blot images of SEC22B and loading control vinculin (VCL) levels from male C57Bl/6N mice administered with adeno-associated viruses expressing a microRNA to silence Sec22b (miR-Sec22b) or a negative control (miR-NC) and fasted for 2h acutely treated with saline (VEH) or acyl-glucagon (GCG). Images are of 3 individual mice per group.

b: Blood glucose levels during the 2h intraperitoneal glucagon (GCG) tolerance test of mice as in A. Data are mean  $\pm$  s.e.m.; n = 5 mice per group.

c: Blood glucose changes from 0 to 30min of mice as in A. Data are mean  $\pm$  s.e.m.; n = 5 mice per group. Statistical tests used were 2-way ANOVA with Holm-Sidak post-hoc tests. Dotted line shows the main effect. Difference between vehicle and glucagon: # $P$  <0.05, ## $P$  <0.01, ### $P$  <0.001; Difference between miR-NC and miR-Sec22b: \* $P$  <0.05, \*\* $P$  <0.01, \*\*\* $P$  <0.001.

d: Liver glycogen levels at 2h of mice as in c.

e: Liver cholesterol levels of mice as in c.

f: Serum cholesterol levels of mice as in c.

g: A heatmap of serum amino acid species at 2h of mice as in c. Abbreviations for serum amino acids are provided in Supplementary File 5.

h-k: Selected serum amino acid levels at 2h of mice as in c.

l: Representative liver western blots for FLAG, GFP, SEC22B and the loading control vinculin (VCL) of male C57Bl/6N mice administered with adeno-associated viruses expressing a microRNA to silence Sec22b (miR-Sec22b) or a negative control (miR-NC), and/or flag-tagged AAV-Sec22b wildtype (WT) or S137A mutant (S137A) cDNA (Sec22b) or a control (Gfp) and treated with either saline (VEH) or acyl-glucagon (GCG) chronically for 3 wk.

m: Body weight of mice as in M. Data are mean  $\pm$  s.e.m.; n = 6 mice per group. Statistical tests used include unpaired two-tailed Student T. test (for miR-NC&GFP&VEH and miR-NC&GFP&GCG) and 2-way ANOVA (for all the glucagon treated groups) with Holm-Sidak post-hoc tests. Difference between vehicle and glucagon: &<0.05, && $P$  <0.01, &&& $P$  <0.001; Difference between miR-NC and miR-Sec22b: # $P$  <0.05, ## $P$  <0.01, ### $P$  <0.001; Difference in GFP, SEC22B-WT and SEC22B-S137A: \* $P$  <0.05, \*\* $P$  <0.01, \*\*\* $P$  <0.001.

n: Blood glucose levels of mice as in m.

o: Liver cholesterol levels of mice as in m.

p: Serum cholesterol levels of mice as in m.

q-v: Selected serum amino acid levels of mice as in m.

Source data are provided as a Source Data file.



### Supplementary Figure 6 (related to Figure 5).

a: Male C57Bl/6N mice administered with adeno-associated viruses expressing a microRNA to silence *Sec22b* (miR-*Sec22b*) with re-expressing of *Sec22b* cDNA (*Sec22b*-WT or *Sec22b*-S137A) or a AAV control (miR-NC & Gfp). The mice were acutely treated with either saline (VEH) or acyl-glucagon (GCG) (n=3/group). Co-immunoprecipitation proteomics analysis of the liver lysates was then conducted. Western blot images of liver phospho-protein kinase A (pPKA) motif protein substrates, FLAG and loading control Vinculin (VCL) NC: control (GFP); WT: Flag-tagged *Sec22b*; S-A: Flag-tagged *Sec22b* S137A mutant. V: saline injection; G: acyl-GCG injection.

b: Western blot images of immunoprecipitation of FLAG-tagged SEC22B. T: total input; UB: unbounded fraction; E: elution; of samples prepared as in A.

c: Principal component analysis (PCA) among Control (red), *Sec22b*-S137A with VEH (green), *Sec22b*-S137 with GCG (purple), *Sec22b*-WT with VEH (blue) and *Sec22b*-WT with GCG (pink) co-immunoprecipitation samples.

d-g: Volcano plots of proteins bounded with *Sec22b*-WT and *Sec22b*-S137A mutant treated with VEH or GCG ( $\text{Log}_2 > 4$ ,  $\text{FDR} < 0.05$ ).

h: STRING visualization of proteins involved in GO pathway Oxidoreductase activity (GO:0016491, molecular function).

i: STRING visualization of proteins involved in GO pathway Endoplasmic reticulum membrane (GO:0005789, cellular component).
