# Supplementary material for: Phosphoproteomics-directed manipulation reveals SEC22B as a hepatocellular signaling node governing metabolic actions of glucagon
Source: PubMed Central journal article supplement — Nat Commun. 2024 Sep 27;15:8390. doi: 10.1038/s41467-024-52703-w (PMC11436942; doi:10.1038/s41467-024-52703-w), 2024-09-27
Supplement: 41467_2024_52703_MOESM3_ESM.pdf [file 41467_2024_52703_MOESM3_ESM.pdf]

## Description of Additional Supplementary Files

### File name: Supplementary Data 1

**Description:** Summary of quantified phosphorylation sites of rat liver samples treated with vehicle (VEH) or glucagon (GCG) for 2, 8 and 32min, along with key details such as log<sub>2</sub> fold changes for each pairwise comparison, as well as corresponding p-values and adjusted p-values.

### File name: Supplementary Data 2

**Description:** Kinase enrichment was performed based on the list of differentially phosphorylated sites of rat liver samples treated with vehicle (VEH) or glucagon (GCG) for 2, 8 and 32min. Sheet 1: Summary of predicated kinase activation by glucagon for 2mins. Sheet 2: Summary of predicated kinase activation by glucagon for 8mins. Sheet 3: Summary of predicated kinase activation by glucagon for 32mins.

### File name: Supplementary Data 3

**Description:** Summary of quantified phosphorylation sites of human hepatoma SNU398-GCGR cells treated with either vehicle (VEH) or glucagon (GCG) (1 nM) for 30min, along with key details such as log<sub>2</sub> fold changes, as well as corresponding p-values and adjusted p-values.

### File name: Supplementary Data 4

**Description:** Co-immunoprecipitation proteomics analysis of the mice liver treated with vehicle or glucagon reveals SEC22B and S137 phosphorylation interactome. Sheet 1: Summary of as protein enrichment with log<sub>2</sub> fold changes, as well as corresponding log<sub>10</sub> p-values and adjusted p-values. Sheet 2: VENN diagram summarizes the amount of proteins interacting with SEC22B under the different conditions (enriched proteins: Log<sub>2</sub>>4, FDR<0.05).

### File name: Supplementary Data 5

**Description:** Full name of abbreviations for serum amino acids and acylcarnitines.

### File name: Supplementary Data 6

**Description:** Summary of actual p-values for multiple comparisons in Figure 3 and Figure 4.
