# Supplementary material for: Phosphoproteomics-directed manipulation reveals SEC22B as a hepatocellular signaling node governing metabolic actions of glucagon
Source: PubMed Central journal article supplement — Nat Commun. 2024 Sep 27;15:8390. doi: 10.1038/s41467-024-52703-w (PMC11436942; doi:10.1038/s41467-024-52703-w), 2024-09-27
Supplement: 41467_2024_52703_MOESM9_ESM.pdf [file 41467_2024_52703_MOESM9_ESM.pdf]

## Statistics summary

### Fasting & Refeeding study (Fig. 3a-d, f-k)

Using Two Way Analysis of Variance (SigmaPlot Software)

All Pairwise Multiple Comparison Procedures (Holm-Sidak method):

Overall significance level = 0.05

#### Fig. 3a Liver TG

Comparisons for factor: **miR**

| Comparison            | Diff of Means | t     | P     | P<0.050 |
|-----------------------|---------------|-------|-------|---------|
| miR-Sec22b vs. miR-NC | 21.243        | 3.933 | 0.001 | Yes     |

#### Fig. 3b Liver TC

Comparisons for factor: **Feed**

| Comparison        | Diff of Means | t     | P     | P<0.050 |
|-------------------|---------------|-------|-------|---------|
| Refed vs. Fasting | 1.116         | 3.947 | 0.001 | Yes     |

Comparisons for factor: **miR**

| Comparison            | Diff of Means | t     | P     | P<0.050 |
|-----------------------|---------------|-------|-------|---------|
| miR-Sec22b vs. miR-NC | 1.000         | 3.537 | 0.003 | Yes     |

#### Fig. 3c Serum TG

| Comparison        | Diff of Means | t     | P      | P<0.050 |
|-------------------|---------------|-------|--------|---------|
| Fasting vs. Refed | 0.298         | 8.163 | <0.001 | Yes     |

Comparisons for factor: **miR**

| Comparison            | Diff of Means | t      | P      | P<0.050 |
|-----------------------|---------------|--------|--------|---------|
| miR-NC vs. miR-Sec22b | 0.539         | 14.767 | <0.001 | Yes     |

Comparisons for factor: **miR within Fasting**

| Comparison            | Diff of Means | t      | P      | P<0.050 |
|-----------------------|---------------|--------|--------|---------|
| miR-NC vs. miR-Sec22b | 0.886         | 17.168 | <0.001 | Yes     |

Comparisons for factor: **miR within Refed**

| Comparison            | Diff of Means | t     | P     | P<0.050 |
|-----------------------|---------------|-------|-------|---------|
| miR-NC vs. miR-Sec22b | 0.192         | 3.716 | 0.002 | Yes     |

Comparisons for factor: **Feed within miR-NC**

| Comparison        | Diff of Means | t      | P      | P<0.050 |
|-------------------|---------------|--------|--------|---------|
| Fasting vs. Refed | 0.645         | 12.498 | <0.001 | Yes     |

Comparisons for factor: **Feed within miR-Sec22b**

| Comparison        | Diff of Means | t     | P     | P<0.050 |
|-------------------|---------------|-------|-------|---------|
| Refed vs. Fasting | 0.0492        | 0.954 | 0.354 | No      |

**Fig. 3d Serum TC**

Comparisons for factor: **Feed**

| <b>Comparison</b> | <b>Diff of Means</b> | <b>t</b> | <b>P</b> | <b>P&lt;0.050</b> |
|-------------------|----------------------|----------|----------|-------------------|
| Refed vs. Fasting | 18.126               | 2.817    | 0.012    | Yes               |

Comparisons for factor: **miR**

| <b>Comparison</b>     | <b>Diff of Means</b> | <b>t</b> | <b>P</b> | <b>P&lt;0.050</b> |
|-----------------------|----------------------|----------|----------|-------------------|
| miR-NC vs. miR-Sec22b | 88.290               | 13.723   | <0.001   | Yes               |

**Fig. 3f Serum C10:1**

| <b>Comparison</b> | <b>Diff of Means</b> | <b>t</b> | <b>P</b> | <b>P&lt;0.050</b> |
|-------------------|----------------------|----------|----------|-------------------|
| Fasting vs. Refed | 0.0426               | 13.097   | <0.001   | Yes               |

Comparisons for factor: **miR**

| <b>Comparison</b>     | <b>Diff of Means</b> | <b>t</b> | <b>P</b> | <b>P&lt;0.050</b> |
|-----------------------|----------------------|----------|----------|-------------------|
| miR-Sec22b vs. miR-NC | 0.0130               | 4.007    | 0.001    | Yes               |

Comparisons for factor: **miR within Fasting**

| <b>Comparison</b>     | <b>Diff of Means</b> | <b>t</b> | <b>P</b> | <b>P&lt;0.050</b> |
|-----------------------|----------------------|----------|----------|-------------------|
| miR-Sec22b vs. miR-NC | 0.0260               | 5.494    | <0.001   | Yes               |

Comparisons for factor: **miR within Refed**

| <b>Comparison</b>     | <b>Diff of Means</b> | <b>t</b> | <b>P</b> | <b>P&lt;0.050</b> |
|-----------------------|----------------------|----------|----------|-------------------|
| miR-Sec22b vs. miR-NC | 0.0000640            | 0.0143   | 0.989    | No                |

Comparisons for factor: **Feed within miR-NC**

| <b>Comparison</b> | <b>Diff of Means</b> | <b>t</b> | <b>P</b> | <b>P&lt;0.050</b> |
|-------------------|----------------------|----------|----------|-------------------|
| Fasting vs. Refed | 0.0297               | 6.260    | <0.001   | Yes               |

Comparisons for factor: **Feed within miR-Sec22b**

| <b>Comparison</b> | <b>Diff of Means</b> | <b>t</b> | <b>P</b> | <b>P&lt;0.050</b> |
|-------------------|----------------------|----------|----------|-------------------|
| Fasting vs. Refed | 0.0556 12.453        | <0.001   | Yes      |                   |

**Fig. 3g Serum C12**

| <b>Comparison</b> | <b>Diff of Means</b> | <b>t</b> | <b>P</b> | <b>P&lt;0.050</b> |
|-------------------|----------------------|----------|----------|-------------------|
| Fasting vs. Refed | 0.0464               | 9.909    | <0.001   | Yes               |

Comparisons for factor: **miR**

| <b>Comparison</b>     | <b>Diff of Means</b> | <b>t</b> | <b>P</b> | <b>P&lt;0.050</b> |
|-----------------------|----------------------|----------|----------|-------------------|
| miR-Sec22b vs. miR-NC | 0.00940              | 2.007    | 0.063    | No                |

Comparisons for factor: **miR within Fasting**

| <b>Comparison</b>     | <b>Diff of Means</b> | <b>t</b> | <b>P</b> | <b>P&lt;0.050</b> |
|-----------------------|----------------------|----------|----------|-------------------|
| miR-Sec22b vs. miR-NC | 0.0208               | 3.059    | 0.008    | Yes               |

Comparisons for factor: **miR within Refed**

| <b>Comparison</b>     | <b>Diff of Means</b> | <b>t</b> | <b>P</b> | <b>P&lt;0.050</b> |
|-----------------------|----------------------|----------|----------|-------------------|
| miR-NC vs. miR-Sec22b | 0.00205              | 0.319    | 0.754    | No                |

Comparisons for factor: **Feed within miR-NC**

| <b>Comparison</b> | <b>Diff of Means</b> | <b>t</b> | <b>P</b> | <b>P&lt;0.050</b> |
|-------------------|----------------------|----------|----------|-------------------|
| Fasting vs. Refed | 0.0350               | 5.130    | <0.001   | Yes               |

Comparisons for factor: **Feed within miR-Sec22b**

| <b>Comparison</b> | <b>Diff of Means</b> | <b>t</b> | <b>P</b> | <b>P&lt;0.050</b> |
|-------------------|----------------------|----------|----------|-------------------|
| Fasting vs. Refed | 0.0579               | 9.004    | <0.001   | Yes               |

### **Fig. 3h Serum C14:1**

Comparisons for factor: **Feed**

| <b>Comparison</b> | <b>Diff of Means</b> | <b>t</b> | <b>P</b> | <b>P&lt;0.050</b> |
|-------------------|----------------------|----------|----------|-------------------|
| Fasting vs. Refed | 0.129                | 13.081   | <0.001   | Yes               |

Comparisons for factor: **miR**

| <b>Comparison</b>     | <b>Diff of Means</b> | <b>t</b> | <b>P</b> | <b>P&lt;0.050</b> |
|-----------------------|----------------------|----------|----------|-------------------|
| miR-Sec22b vs. miR-NC | 0.0311               | 3.165    | 0.006    | Yes               |

Comparisons for factor: **miR within Fasting**

| <b>Comparison</b>     | <b>Diff of Means</b> | <b>t</b> | <b>P</b> | <b>P&lt;0.050</b> |
|-----------------------|----------------------|----------|----------|-------------------|
| miR-Sec22b vs. miR-NC | 0.0706               | 4.941    | <0.001   | Yes               |

Comparisons for factor: **miR within Refed**

| <b>Comparison</b>     | <b>Diff of Means</b> | <b>t</b> | <b>P</b> | <b>P&lt;0.050</b> |
|-----------------------|----------------------|----------|----------|-------------------|
| miR-NC vs. miR-Sec22b | 0.00845              | 0.627    | 0.540    | No                |

Comparisons for factor: **Feed within miR-NC**

| <b>Comparison</b> | <b>Diff of Means</b> | <b>t</b> | <b>P</b> | <b>P&lt;0.050</b> |
|-------------------|----------------------|----------|----------|-------------------|
| Fasting vs. Refed | 0.0890               | 6.223    | <0.001   | Yes               |

Comparisons for factor: **Feed within miR-Sec22b**

| <b>Comparison</b> | <b>Diff of Means</b> | <b>t</b> | <b>P</b> | <b>P&lt;0.050</b> |
|-------------------|----------------------|----------|----------|-------------------|
| Fasting vs. Refed | 0.168                | 12.468   | <0.001   | Yes               |

### **Fig. 3i Serum Ala**

Comparisons for factor: **Feed**

| <b>Comparison</b> | <b>Diff of Means</b> | <b>t</b> | <b>P</b> | <b>P&lt;0.050</b> |
|-------------------|----------------------|----------|----------|-------------------|
| Refed vs. Fasting | 383.619              | 7.062    | <0.001   | Yes               |

Comparisons for factor: **miR**

| <b>Comparison</b>     | <b>Diff of Means</b> | <b>t</b> | <b>P</b> | <b>P&lt;0.050</b> |
|-----------------------|----------------------|----------|----------|-------------------|
| miR-Sec22b vs. miR-NC | 156.298              | 2.877    | 0.012    | Yes               |

Comparisons for factor: **miR within Fasting**

| <b>Comparison</b> | <b>Diff of Means</b> | <b>t</b> | <b>P</b> | <b>P&lt;0.050</b> |
|-------------------|----------------------|----------|----------|-------------------|
|-------------------|----------------------|----------|----------|-------------------|

|                       |        |       |       |    |
|-----------------------|--------|-------|-------|----|
| miR-NC vs. miR-Sec22b | 28.902 | 0.366 | 0.720 | No |
|-----------------------|--------|-------|-------|----|

Comparisons for factor: **miR within Refed**

| <b>Comparison</b>     | <b>Diff of Means</b> | <b>t</b> | <b>P</b> | <b>P&lt;0.050</b> |
|-----------------------|----------------------|----------|----------|-------------------|
| miR-Sec22b vs. miR-NC | 341.498              | 4.582    | <0.001   | Yes               |

Comparisons for factor: **Feed within miR-NC**

| <b>Comparison</b> | <b>Diff of Means</b> | <b>t</b> | <b>P</b> | <b>P&lt;0.050</b> |
|-------------------|----------------------|----------|----------|-------------------|
| Refed vs. Fasting | 198.420              | 2.510    | 0.024    | Yes               |

Comparisons for factor: **Feed within miR-Sec22b**

| <b>Comparison</b> | <b>Diff of Means</b> | <b>t</b> | <b>P</b> | <b>P&lt;0.050</b> |
|-------------------|----------------------|----------|----------|-------------------|
| Refed vs. Fasting | 568.819              | 7.632    | <0.001   | Yes               |

### **Fig. 3j Serum Gly**

Comparisons for factor: **Feed**

| <b>Comparison</b> | <b>Diff of Means</b> | <b>t</b> | <b>P</b> | <b>P&lt;0.050</b> |
|-------------------|----------------------|----------|----------|-------------------|
| Refed vs. Fasting | 95.054               | 4.383    | <0.001   | Yes               |

Comparisons for factor: **miR**

| <b>Comparison</b>     | <b>Diff of Means</b> | <b>t</b> | <b>P</b> | <b>P&lt;0.050</b> |
|-----------------------|----------------------|----------|----------|-------------------|
| miR-Sec22b vs. miR-NC | 120.129              | 5.539    | <0.001   | Yes               |

Comparisons for factor: **miR within Fasting**

| <b>Comparison</b>     | <b>Diff of Means</b> | <b>t</b> | <b>P</b> | <b>P&lt;0.050</b> |
|-----------------------|----------------------|----------|----------|-------------------|
| miR-Sec22b vs. miR-NC | 62.818               | 1.990    | 0.065    | No                |

Comparisons for factor: **miR within Refed**

| <b>Comparison</b>     | <b>Diff of Means</b> | <b>t</b> | <b>P</b> | <b>P&lt;0.050</b> |
|-----------------------|----------------------|----------|----------|-------------------|
| miR-Sec22b vs. miR-NC | 177.440              | 5.964    | <0.001   | Yes               |

Comparisons for factor: **Feed within miR-NC**

| <b>Comparison</b> | <b>Diff of Means</b> | <b>t</b> | <b>P</b> | <b>P&lt;0.050</b> |
|-------------------|----------------------|----------|----------|-------------------|
| Refed vs. Fasting | 37.742               | 1.196    | 0.250    | No                |

Comparisons for factor: **Feed within miR-Sec22b**

| <b>Comparison</b> | <b>Diff of Means</b> | <b>t</b> | <b>P</b> | <b>P&lt;0.050</b> |
|-------------------|----------------------|----------|----------|-------------------|
| Refed vs. Fasting | 152.365              | 5.121    | <0.001   | Yes               |

### **Fig. 3k Serum Orn**

Comparisons for factor: **Feed**

| <b>Comparison</b> | <b>Diff of Means</b> | <b>t</b> | <b>P</b> | <b>P&lt;0.050</b> |
|-------------------|----------------------|----------|----------|-------------------|
| Refed vs. Fasting | 59.534               | 1.651    | 0.119    | No                |

Comparisons for factor: **miR**

| <b>Comparison</b>     | <b>Diff of Means</b> | <b>t</b> | <b>P</b> | <b>P&lt;0.050</b> |
|-----------------------|----------------------|----------|----------|-------------------|
| miR-Sec22b vs. miR-NC | 203.073              | 5.632    | <0.001   | Yes               |

Comparisons for factor: **miR within Fasting**

| <b>Comparison</b>     | <b>Diff of Means</b> | <b>t</b> | <b>P</b> | <b>P&lt;0.050</b> |
|-----------------------|----------------------|----------|----------|-------------------|
| miR-Sec22b vs. miR-NC | 107.708              | 2.053    | 0.058    | No                |

Comparisons for factor: **miR within Refed**

| <b>Comparison</b>     | <b>Diff of Means</b> | <b>t</b> | <b>P</b> | <b>P&lt;0.050</b> |
|-----------------------|----------------------|----------|----------|-------------------|
| miR-Sec22b vs. miR-NC | 298.438              | 6.033    | <0.001   | Yes               |

Comparisons for factor: **Feed within miR-NC**

| <b>Comparison</b> | <b>Diff of Means</b> | <b>t</b> | <b>P</b> | <b>P&lt;0.050</b> |
|-------------------|----------------------|----------|----------|-------------------|
| Fasting vs. Refed | 35.831               | 0.683    | 0.505    | No                |

Comparisons for factor: **Feed within miR-Sec22b**

| <b>Comparison</b> | <b>Diff of Means</b> | <b>t</b> | <b>P</b> | <b>P&lt;0.050</b> |
|-------------------|----------------------|----------|----------|-------------------|
| Refed vs. Fasting | 154.899              | 3.131    | 0.007    | Yes               |

## Statistics summary

### Refeeding SEC22B re-introduction study (Fig. 3l-n, p, r-u)

Using Two Way Analysis of Variance (SigmaPlot Software)

All Pairwise Multiple Comparison Procedures (Holm-Sidak method):

Overall significance level = 0.05

#### Fig. 3l Serum Ala

Comparisons for factor: **cDNA within miR-NC**

| <b>Comparison</b> | <b>Diff of Means</b> | <b>t</b> | <b>P</b> | <b>P&lt;0.050</b> |
|-------------------|----------------------|----------|----------|-------------------|
| WT vs. GFP        | 86.349               | 1.220    | 0.240    | No                |

Comparisons for factor: **cDNA within miR-Sec22b**

| <b>Comparison</b> | <b>Diff of Means</b> | <b>t</b> | <b>P</b> | <b>P&lt;0.050</b> |
|-------------------|----------------------|----------|----------|-------------------|
| GFP vs. WT        | 153.997              | 2.176    | 0.045    | Yes               |

Comparisons for factor: **miR within GFP**

| <b>Comparison</b>     | <b>Diff of Means</b> | <b>t</b> | <b>P</b> | <b>P&lt;0.050</b> |
|-----------------------|----------------------|----------|----------|-------------------|
| miR-Sec22b vs. miR-NC | 257.011              | 3.632    | 0.002    | Yes               |

Comparisons for factor: **miR within WT**

| <b>Comparison</b>     | <b>Diff of Means</b> | <b>t</b> | <b>P</b> | <b>P&lt;0.050</b> |
|-----------------------|----------------------|----------|----------|-------------------|
| miR-Sec22b vs. miR-NC | 16.666               | 0.236    | 0.817    | No                |

#### Fig. 3m Serum Gly

Comparisons for factor: **cDNA within miR-NC**

| <b>Comparison</b> | <b>Diff of Means</b> | <b>t</b> | <b>P</b> | <b>P&lt;0.050</b> |
|-------------------|----------------------|----------|----------|-------------------|
| WT vs. GFP        | 16.275               | 0.836    | 0.415    | No                |

Comparisons for factor: **cDNA within miR-Sec22b**

| <b>Comparison</b> | <b>Diff of Means</b> | <b>t</b> | <b>P</b> | <b>P&lt;0.050</b> |
|-------------------|----------------------|----------|----------|-------------------|
| GFP vs. WT        | 86.432               | 4.442    | <0.001   | Yes               |

Comparisons for factor: **miR within GFP**

| <b>Comparison</b>     | <b>Diff of Means</b> | <b>t</b> | <b>P</b> | <b>P&lt;0.050</b> |
|-----------------------|----------------------|----------|----------|-------------------|
| miR-Sec22b vs. miR-NC | 123.200              | 6.331    | <0.001   | Yes               |

Comparisons for factor: **miR within WT**

| <b>Comparison</b>     | <b>Diff of Means</b> | <b>t</b> | <b>P</b> | <b>P&lt;0.050</b> |
|-----------------------|----------------------|----------|----------|-------------------|
| miR-Sec22b vs. miR-NC | 20.493               | 1.053    | 0.308    | No                |

#### Fig. 3n Serum Orn

Comparisons for factor: **cDNA within miR-NC**

| <b>Comparison</b> | <b>Diff of Means</b> | <b>t</b> | <b>P</b> | <b>P&lt;0.050</b> |
|-------------------|----------------------|----------|----------|-------------------|
| WT vs. GFP        | 5.542                | 0.702    | 0.493    | No                |

Comparisons for factor: **cDNA within miR-Sec22b**

| Comparison | Diff of Means | t     | P     | P<0.050 |
|------------|---------------|-------|-------|---------|
| GFP vs. WT | 30.822        | 3.903 | 0.001 | Yes     |

Comparisons for factor: **miR within GFP**

| Comparison            | Diff of Means | t     | P     | P<0.050 |
|-----------------------|---------------|-------|-------|---------|
| miR-Sec22b vs. miR-NC | 25.530        | 3.232 | 0.005 | Yes     |

Comparisons for factor: **miR within WT**

| Comparison            | Diff of Means | t     | P     | P<0.050 |
|-----------------------|---------------|-------|-------|---------|
| miR-NC vs. miR-Sec22b | 10.835        | 1.372 | 0.189 | No      |

**Fig. 3p Normalized SEC22B**

Comparisons for factor: **cDNA within miR-NC**

| Comparison | Diff of Means | t      | P      | P<0.050 |
|------------|---------------|--------|--------|---------|
| WT vs. GFP | 1.280         | 10.820 | <0.001 | Yes     |

Comparisons for factor: **cDNA within miR-Sec22b**

| Comparison | Diff of Means | t     | P      | P<0.050 |
|------------|---------------|-------|--------|---------|
| WT vs. GFP | 0.739         | 6.245 | <0.001 | Yes     |

Comparisons for factor: **miR within GFP**

| Comparison            | Diff of Means | t     | P      | P<0.050 |
|-----------------------|---------------|-------|--------|---------|
| miR-NC vs. miR-Sec22b | 0.790         | 6.676 | <0.001 | Yes     |

Comparisons for factor: **miR within WT**

| Comparison            | Diff of Means | t      | P      | P<0.050 |
|-----------------------|---------------|--------|--------|---------|
| miR-NC vs. miR-Sec22b | 1.331         | 11.251 | <0.001 | Yes     |

**Fig. 3r Serum TG**

Comparisons for factor: **cDNA within miR-NC**

| Comparison | Diff of Means | t     | P     | P<0.050 |
|------------|---------------|-------|-------|---------|
| WT vs. GFP | 0.0678        | 0.530 | 0.604 | No      |

Comparisons for factor: **cDNA within miR-Sec22b**

| Comparison | Diff of Means | t     | P      | P<0.050 |
|------------|---------------|-------|--------|---------|
| WT vs. GFP | 0.681         | 5.322 | <0.001 | Yes     |

Comparisons for factor: **miR within GFP**

| Comparison            | Diff of Means | t     | P     | P<0.050 |
|-----------------------|---------------|-------|-------|---------|
| miR-NC vs. miR-Sec22b | 0.373         | 2.917 | 0.010 | Yes     |

Comparisons for factor: **miR within WT**

| Comparison            | Diff of Means | t     | P     | P<0.050 |
|-----------------------|---------------|-------|-------|---------|
| miR-Sec22b vs. miR-NC | 0.240         | 1.875 | 0.079 | No      |

### Fig. 3s Serum TC

Comparisons for factor: **cDNA within miR-NC**

| <b>Comparison</b> | <b>Diff of Means</b> | <b>t</b> | <b>P</b> | <b>P&lt;0.050</b> |
|-------------------|----------------------|----------|----------|-------------------|
| GFP vs. WT        | 23.242               | 2.348    | 0.032    | Yes               |

Comparisons for factor: **cDNA within miR-Sec22b**

| <b>Comparison</b> | <b>Diff of Means</b> | <b>t</b> | <b>P</b> | <b>P&lt;0.050</b> |
|-------------------|----------------------|----------|----------|-------------------|
| WT vs. GFP        | 70.255               | 7.096    | <0.001   | Yes               |

Comparisons for factor: **miR within GFP**

| <b>Comparison</b>     | <b>Diff of Means</b> | <b>t</b> | <b>P</b> | <b>P&lt;0.050</b> |
|-----------------------|----------------------|----------|----------|-------------------|
| miR-NC vs. miR-Sec22b | 112.243              | 11.337   | <0.001   | Yes               |

Comparisons for factor: **miR within WT**

| <b>Comparison</b>     | <b>Diff of Means</b> | <b>t</b> | <b>P</b> | <b>P&lt;0.050</b> |
|-----------------------|----------------------|----------|----------|-------------------|
| miR-NC vs. miR-Sec22b | 18.746               | 1.893    | 0.077    | No                |

### Fig. 3t Serum ALT

Comparisons for factor: **cDNA within miR-NC**

| <b>Comparison</b> | <b>Diff of Means</b> | <b>t</b> | <b>P</b> | <b>P&lt;0.050</b> |
|-------------------|----------------------|----------|----------|-------------------|
| GFP vs. WT        | 5.206                | 0.383    | 0.707    | No                |

Comparisons for factor: **cDNA within miR-Sec22b**

| <b>Comparison</b> | <b>Diff of Means</b> | <b>t</b> | <b>P</b> | <b>P&lt;0.050</b> |
|-------------------|----------------------|----------|----------|-------------------|
| GFP vs. WT        | 66.984               | 4.928    | <0.001   | Yes               |

Comparisons for factor: **miR within GFP**

| <b>Comparison</b>     | <b>Diff of Means</b> | <b>t</b> | <b>P</b> | <b>P&lt;0.050</b> |
|-----------------------|----------------------|----------|----------|-------------------|
| miR-Sec22b vs. miR-NC | 73.144               | 5.381    | <0.001   | Yes               |

Comparisons for factor: **miR within WT**

| <b>Comparison</b>     | <b>Diff of Means</b> | <b>t</b> | <b>P</b> | <b>P&lt;0.050</b> |
|-----------------------|----------------------|----------|----------|-------------------|
| miR-Sec22b vs. miR-NC | 11.366               | 0.836    | 0.415    | No                |

### Fig. 3u Serum AST

Comparisons for factor: **cDNA within miR-NC**

| <b>Comparison</b> | <b>Diff of Means</b> | <b>t</b> | <b>P</b> | <b>P&lt;0.050</b> |
|-------------------|----------------------|----------|----------|-------------------|
| GFP vs. WT        | 4.440                | 0.259    | 0.799    | No                |

Comparisons for factor: **cDNA within miR-Sec22b**

| <b>Comparison</b> | <b>Diff of Means</b> | <b>t</b> | <b>P</b> | <b>P&lt;0.050</b> |
|-------------------|----------------------|----------|----------|-------------------|
| GFP vs. WT        | 51.448               | 2.999    | 0.009    | Yes               |

Comparisons for factor: **miR within GFP**

| <b>Comparison</b>     | <b>Diff of Means</b> | <b>t</b> | <b>P</b> | <b>P&lt;0.050</b> |
|-----------------------|----------------------|----------|----------|-------------------|
| miR-Sec22b vs. miR-NC | 69.056               | 4.025    | <0.001   | Yes               |



Comparisons for factor: **miR within WT**

| <b>Comparison</b>     | <b>Diff of Means</b> |       | <b>t</b> | <b>P</b> | <b>P&lt;0.050</b> |
|-----------------------|----------------------|-------|----------|----------|-------------------|
| miR-Sec22b vs. miR-NC | 22.049               | 1.285 | 0.217    | No       |                   |

## Statistics summary

### Acute glucagon SEC22B knockdown (KD) study (Fig. 4b-j)

Using Two Way Analysis of Variance (SigmaPlot Software)  
All Pairwise Multiple Comparison Procedures (Holm-Sidak method):  
Overall significance level = 0.05

#### Fig. 4b Liver p-PKA motif quantification

Comparisons for factor: **Inj (Injection)**

| Comparison  | Diff of Means | t     | P      | P<0.050 |
|-------------|---------------|-------|--------|---------|
| GCG vs. VEH | 597869.400    | 4.516 | <0.001 | Yes     |

#### Fig. 4c Liver TG

Comparisons for factor: **AAV**

| Comparison | Diff of Means | t     | P     | P<0.050 |
|------------|---------------|-------|-------|---------|
| KD vs. NC  | 13.440        | 3.720 | 0.002 | Yes     |

#### Fig. 4d serum TG

Comparisons for factor: **AAV**

| Comparison | Diff of Means | t     | P     | P<0.050 |
|------------|---------------|-------|-------|---------|
| NC vs. KD  | 0.575         | 3.476 | 0.003 | Yes     |

Comparisons for factor: **Inj**

| Comparison  | Diff of Means | t     | P     | P<0.050 |
|-------------|---------------|-------|-------|---------|
| VEH vs. GCG | 0.394         | 2.383 | 0.030 | Yes     |

#### Fig. 4e serum Ala

Comparisons for factor: **miR**

| Comparison | Diff of Means | t     | P     | P<0.050 |
|------------|---------------|-------|-------|---------|
| KD vs. NC  | 49.491        | 2.450 | 0.026 | Yes     |

Comparisons for factor: **Inj**

| Comparison  | Diff of Means | t     | P     | P<0.050 |
|-------------|---------------|-------|-------|---------|
| VEH vs. GCG | 2.291         | 0.113 | 0.911 | No      |

Comparisons for factor: **Inj within NC**

| Comparison  | Diff of Means | t     | P     | P<0.050 |
|-------------|---------------|-------|-------|---------|
| VEH vs. GCG | 25.600        | 0.896 | 0.383 | No      |

Comparisons for factor: **Inj within KD**

| Comparison  | Diff of Means | t     | P     | P<0.050 |
|-------------|---------------|-------|-------|---------|
| GCG vs. VEH | 21.018        | 0.736 | 0.473 | No      |

Comparisons for factor: **miR within VEH**

| Comparison | Diff of Means | t     | P     | P<0.050 |
|------------|---------------|-------|-------|---------|
| KD vs. NC  | 26.182        | 0.917 | 0.373 | No      |

Comparisons for factor: **miR within GCG**

| <b>Comparison</b> | <b>Diff of Means</b> | <b>t</b> | <b>P</b> | <b>P&lt;0.050</b> |
|-------------------|----------------------|----------|----------|-------------------|
| KD vs. NC         | 72.800               | 2.548    | 0.021    | Yes               |

**Fig. 4e serum Gly**

Comparisons for factor: **miR**

| <b>Comparison</b> | <b>Diff of Means</b> | <b>t</b> | <b>P</b> | <b>P&lt;0.050</b> |
|-------------------|----------------------|----------|----------|-------------------|
| KD vs. NC         | 49.491               | 2.450    | 0.026    | Yes               |

Comparisons for factor: **Inj**

| <b>Comparison</b> | <b>Diff of Means</b> | <b>t</b> | <b>P</b> | <b>P&lt;0.050</b> |
|-------------------|----------------------|----------|----------|-------------------|
| VEH vs. GCG       | 2.291                | 0.113    | 0.911    | No                |

Comparisons for factor: **Inj within NC**

| <b>Comparison</b> | <b>Diff of Means</b> | <b>t</b> | <b>P</b> | <b>P&lt;0.050</b> |
|-------------------|----------------------|----------|----------|-------------------|
| VEH vs. GCG       | 25.600               | 0.896    | 0.383    | No                |

Comparisons for factor: **Inj within KD**

| <b>Comparison</b> | <b>Diff of Means</b> | <b>t</b> | <b>P</b> | <b>P&lt;0.050</b> |
|-------------------|----------------------|----------|----------|-------------------|
| GCG vs. VEH       | 21.018               | 0.736    | 0.473    | No                |

Comparisons for factor: **miR within VEH**

| <b>Comparison</b> | <b>Diff of Means</b> | <b>t</b> | <b>P</b> | <b>P&lt;0.050</b> |
|-------------------|----------------------|----------|----------|-------------------|
| KD vs. NC         | 26.182               | 0.917    | 0.373    | No                |

Comparisons for factor: **miR within GCG**

| <b>Comparison</b> | <b>Diff of Means</b> | <b>t</b> | <b>P</b> | <b>P&lt;0.050</b> |
|-------------------|----------------------|----------|----------|-------------------|
| KD vs. NC         | 72.800               | 2.548    | 0.021    | Yes               |

**Fig. 4g serum Orn**

Comparisons for factor: **miR**

| <b>Comparison</b> | <b>Diff of Means</b> | <b>t</b> | <b>P</b> | <b>P&lt;0.050</b> |
|-------------------|----------------------|----------|----------|-------------------|
| KD vs. NC         | 66.339               | 2.916    | 0.010    | Yes               |

Comparisons for factor: **Inj**

| <b>Comparison</b> | <b>Diff of Means</b> | <b>t</b> | <b>P</b> | <b>P&lt;0.050</b> |
|-------------------|----------------------|----------|----------|-------------------|
| GCG vs. VEH       | 74.070               | 3.255    | 0.005    | Yes               |

Comparisons for factor: **Inj within NC**

| <b>Comparison</b> | <b>Diff of Means</b> | <b>t</b> | <b>P</b> | <b>P&lt;0.050</b> |
|-------------------|----------------------|----------|----------|-------------------|
| GCG vs. VEH       | 28.512               | 0.886    | 0.389    | No                |

Comparisons for factor: **Inj within KD**

| <b>Comparison</b> | <b>Diff of Means</b> | <b>t</b> | <b>P</b> | <b>P&lt;0.050</b> |
|-------------------|----------------------|----------|----------|-------------------|
| GCG vs. VEH       | 119.629              | 3.718    | 0.002    | Yes               |

Comparisons for factor: **miR within VEH**

| Comparison | Diff of Means | t     | P     | P<0.050 |
|------------|---------------|-------|-------|---------|
| KD vs. NC  | 20.781        | 0.646 | 0.528 | No      |

Comparisons for factor: **miR within GCG**

| Comparison | Diff of Means | t     | P     | P<0.050 |
|------------|---------------|-------|-------|---------|
| KD vs. NC  | 111.898       | 3.477 | 0.003 | Yes     |

**Fig. 4h serum Cit**

Comparisons for factor: **miR**

| Comparison | Diff of Means | t     | P     | P<0.050 |
|------------|---------------|-------|-------|---------|
| KD vs. NC  | 6.501         | 3.314 | 0.004 | Yes     |

Comparisons for factor: **Inj**

| Comparison  | Diff of Means | t     | P     | P<0.050 |
|-------------|---------------|-------|-------|---------|
| VEH vs. GCG | 2.878         | 1.467 | 0.162 | No      |

Comparisons for factor: **Inj within NC**

| Comparison  | Diff of Means | t     | P     | P<0.050 |
|-------------|---------------|-------|-------|---------|
| VEH vs. GCG | 5.184         | 1.868 | 0.080 | No      |

Comparisons for factor: **Inj within KD**

| Comparison  | Diff of Means | t     | P     | P<0.050 |
|-------------|---------------|-------|-------|---------|
| VEH vs. GCG | 0.572         | 0.206 | 0.839 | No      |

Comparisons for factor: **miR within VEH**

| Comparison | Diff of Means | t     | P     | P<0.050 |
|------------|---------------|-------|-------|---------|
| KD vs. NC  | 4.195         | 1.512 | 0.150 | No      |

Comparisons for factor: **miR within GCG**

| Comparison | Diff of Means | t     | P     | P<0.050 |
|------------|---------------|-------|-------|---------|
| KD vs. NC  | 8.807         | 3.174 | 0.006 | Yes     |

**Fig. 4j serum Val**

Comparisons for factor: **miR**

| Comparison | Diff of Means | t     | P      | P<0.050 |
|------------|---------------|-------|--------|---------|
| KD vs. NC  | 54.880        | 4.491 | <0.001 | Yes     |

Comparisons for factor: **Inj**

| Comparison  | Diff of Means | t     | P      | P<0.050 |
|-------------|---------------|-------|--------|---------|
| GCG vs. VEH | 75.411        | 6.171 | <0.001 | Yes     |

Comparisons for factor: **Inj within NC**

| Comparison  | Diff of Means | t     | P     | P<0.050 |
|-------------|---------------|-------|-------|---------|
| GCG vs. VEH | 57.107        | 3.305 | 0.004 | Yes     |

Comparisons for factor: **Inj within KD**

| <b>Comparison</b> | <b>Diff of Means</b> | <b>t</b> | <b>P</b> | <b>P&lt;0.050</b> |
|-------------------|----------------------|----------|----------|-------------------|
| GCG vs. VEH       | 93.715               | 5.423    | <0.001   | Yes               |

Comparisons for factor: **miR within VEH**

| <b>Comparison</b> | <b>Diff of Means</b> | <b>t</b> | <b>P</b> | <b>P&lt;0.050</b> |
|-------------------|----------------------|----------|----------|-------------------|
| KD vs. NC         | 36.576               | 2.117    | 0.050    | No                |

Comparisons for factor: **miR within GCG**

| <b>Comparison</b> | <b>Diff of Means</b> | <b>t</b> | <b>P</b> | <b>P&lt;0.050</b> |
|-------------------|----------------------|----------|----------|-------------------|
| KD vs. NC         | 73.184               | 4.235    | <0.001   | Yes               |

**Fig. 4i serum Leu/Ile**

Comparisons for factor: **miR**

| <b>Comparison</b> | <b>Diff of Means</b> | <b>t</b> | <b>P</b> | <b>P&lt;0.050</b> |
|-------------------|----------------------|----------|----------|-------------------|
| KD vs. NC         | 113.491              | 2.784    | 0.013    | Yes               |

Comparisons for factor: **Inj**

| <b>Comparison</b> | <b>Diff of Means</b> | <b>t</b> | <b>P</b> | <b>P&lt;0.050</b> |
|-------------------|----------------------|----------|----------|-------------------|
| GCG vs. VEH       | 140.992              | 3.459    | 0.003    | Yes               |

Comparisons for factor: **Inj within NC**

| <b>Comparison</b> | <b>Diff of Means</b> | <b>t</b> | <b>P</b> | <b>P&lt;0.050</b> |
|-------------------|----------------------|----------|----------|-------------------|
| GCG vs. VEH       | 79.942               | 1.387    | 0.184    | No                |

Comparisons for factor: **Inj within KD**

| <b>Comparison</b> | <b>Diff of Means</b> | <b>t</b> | <b>P</b> | <b>P&lt;0.050</b> |
|-------------------|----------------------|----------|----------|-------------------|
| GCG vs. VEH       | 202.042              | 3.505    | 0.003    | Yes               |

Comparisons for factor: **miR within VEH**

| <b>Comparison</b> | <b>Diff of Means</b> | <b>t</b> | <b>P</b> | <b>P&lt;0.050</b> |
|-------------------|----------------------|----------|----------|-------------------|
| KD vs. NC         | 52.442               | 0.910    | 0.376    | No                |

Comparisons for factor: **miR within GCG**

| <b>Comparison</b> | <b>Diff of Means</b> | <b>t</b> | <b>P</b> | <b>P&lt;0.050</b> |
|-------------------|----------------------|----------|----------|-------------------|
| KD vs. NC         | 174.541              | 3.028    | 0.008    | Yes               |

## Statistics summary

### Chronic glucagon SEC22B S137A study (Fig. 4k-l, n-u)

Using Two Way Analysis of Variance (SigmaPlot Software)

All Pairwise Multiple Comparison Procedures (Holm-Sidak method):

Overall significance level = 0.05

#### Fig. 4k liver glycogen

Comparisons for factor: **cDNA within miR-NC**

| Comparison  | Diff of Means | t     | P     | P<0.050 |
|-------------|---------------|-------|-------|---------|
| WT vs. GFP  | 81.205        | 2.026 | 0.147 | No      |
| WT vs. S-A  | 74.863        | 1.867 | 0.138 | No      |
| S-A vs. GFP | 6.342         | 0.158 | 0.875 | No      |

Comparisons for factor: **cDNA within miR-Sec22b**

| Comparison  | Diff of Means | t     | P      | P<0.050 |
|-------------|---------------|-------|--------|---------|
| GFP vs. WT  | 176.355       | 4.399 | <0.001 | Yes     |
| S-A vs. WT  | 111.948       | 2.792 | 0.018  | Yes     |
| GFP vs. S-A | 64.407        | 1.607 | 0.119  | No      |

Comparisons for factor: **miR within GFP**

| Comparison            | Diff of Means | t     | P      | P<0.050 |
|-----------------------|---------------|-------|--------|---------|
| miR-Sec22b vs. miR-NC | 196.048       | 4.890 | <0.001 | Yes     |

Comparisons for factor: **miR within WT**

| Comparison            | Diff of Means | t     | P     | P<0.050 |
|-----------------------|---------------|-------|-------|---------|
| miR-NC vs. miR-Sec22b | 61.512        | 1.534 | 0.135 | No      |

Comparisons for factor: **miR within S-A**

| Comparison            | Diff of Means | t     | P     | P<0.050 |
|-----------------------|---------------|-------|-------|---------|
| miR-Sec22b vs. miR-NC | 125.300       | 3.125 | 0.004 | Yes     |

#### Fig. 4l serum urea

Comparisons for factor: **cDNA within miR-NC**

| Comparison  | Diff of Means | t     | P     | P<0.050 |
|-------------|---------------|-------|-------|---------|
| WT vs. S-A  | 5.682         | 1.253 | 0.525 | No      |
| WT vs. GFP  | 5.178         | 1.142 | 0.456 | No      |
| GFP vs. S-A | 0.503         | 0.111 | 0.912 | No      |

Comparisons for factor: **cDNA within miR-Sec22b**

| Comparison  | Diff of Means | t      | P     | P<0.050 |
|-------------|---------------|--------|-------|---------|
| S-A vs. WT  | 11.153        | 2.460  | 0.058 | No      |
| GFP vs. WT  | 10.910        | 2.406  | 0.044 | Yes     |
| S-A vs. GFP | 0.243         | 0.0537 | 0.958 | No      |

Comparisons for factor: **miR within GFP**

| Comparison            | Diff of Means | t     | P     | P<0.050 |
|-----------------------|---------------|-------|-------|---------|
| miR-Sec22b vs. miR-NC | 16.037        | 3.537 | 0.001 | Yes     |

Comparisons for factor: **miR within WT**

| Comparison            | Diff of Means | t      | P     | P<0.050 |
|-----------------------|---------------|--------|-------|---------|
| miR-NC vs. miR-Sec22b | 0.0517        | 0.0114 | 0.991 | No      |

Comparisons for factor: **miR within S-A**

| Comparison            | Diff of Means | t     | P      | P<0.050 |
|-----------------------|---------------|-------|--------|---------|
| miR-Sec22b vs. miR-NC | 16.783        | 3.702 | <0.001 | Yes     |

**Fig. 4n serum Ala**

Comparisons for factor: **cDNA within miR-NC**

| Comparison  | Diff of Means | t      | P     | P<0.050 |
|-------------|---------------|--------|-------|---------|
| S-A vs. WT  | 6.538         | 0.131  | 0.999 | No      |
| S-A vs. GFP | 5.607         | 0.112  | 0.999 | No      |
| GFP vs. WT  | 0.931         | 0.0187 | 0.999 | No      |

Comparisons for factor: **cDNA within miR-Sec22b**

| Comparison  | Diff of Means | t     | P     | P<0.050 |
|-------------|---------------|-------|-------|---------|
| GFP vs. WT  | 152.931       | 3.066 | 0.014 | Yes     |
| GFP vs. S-A | 85.168        | 1.707 | 0.187 | No      |
| S-A vs. WT  | 67.763        | 1.358 | 0.187 | No      |

Comparisons for factor: **miR within GFP**

| Comparison            | Diff of Means | t     | P      | P<0.050 |
|-----------------------|---------------|-------|--------|---------|
| miR-Sec22b vs. miR-NC | 202.267       | 4.055 | <0.001 | Yes     |

Comparisons for factor: **miR within WT**

| Comparison            | Diff of Means | t     | P     | P<0.050 |
|-----------------------|---------------|-------|-------|---------|
| miR-Sec22b vs. miR-NC | 50.267        | 1.008 | 0.322 | No      |

Comparisons for factor: **miR within S-A**

| Comparison            | Diff of Means | t     | P     | P<0.050 |
|-----------------------|---------------|-------|-------|---------|
| miR-Sec22b vs. miR-NC | 111.492       | 2.235 | 0.033 | Yes     |

**Fig. 4o serum Gly**

Comparisons for factor: **cDNA within miR-NC**

| Comparison  | Diff of Means | t     | P     | P<0.050 |
|-------------|---------------|-------|-------|---------|
| WT vs. GFP  | 33.454        | 1.081 | 0.639 | No      |
| WT vs. S-A  | 19.552        | 0.632 | 0.781 | No      |
| S-A vs. GFP | 13.902        | 0.449 | 0.781 | No      |

Comparisons for factor: **cDNA within miR-Sec22b**

| Comparison  | Diff of Means | t     | P     | P<0.050 |
|-------------|---------------|-------|-------|---------|
| GFP vs. WT  | 84.784        | 2.741 | 0.030 | Yes     |
| GFP vs. S-A | 48.448        | 1.566 | 0.239 | No      |
| S-A vs. WT  | 36.336        | 1.175 | 0.249 | No      |

Comparisons for factor: **miR within GFP**

| <b>Comparison</b>     | <b>Diff of Means</b> | <b>t</b> | <b>P</b> | <b>P&lt;0.050</b> |
|-----------------------|----------------------|----------|----------|-------------------|
| miR-Sec22b vs. miR-NC | 165.710              | 5.356    | <0.001   | Yes               |

Comparisons for factor: **miR within WT**

| <b>Comparison</b>     | <b>Diff of Means</b> | <b>t</b> | <b>P</b> | <b>P&lt;0.050</b> |
|-----------------------|----------------------|----------|----------|-------------------|
| miR-Sec22b vs. miR-NC | 47.472               | 1.534    | 0.135    | No                |

Comparisons for factor: **miR within S-A**

| <b>Comparison</b>     | <b>Diff of Means</b> | <b>t</b> | <b>P</b> | <b>P&lt;0.050</b> |
|-----------------------|----------------------|----------|----------|-------------------|
| miR-Sec22b vs. miR-NC | 103.360              | 3.341    | 0.002    | Yes               |

#### **Fig. 4p serum Orn**

Comparisons for factor: **cDNA within miR-NC**

| <b>Comparison</b> | <b>Diff of Means</b> | <b>t</b> | <b>P</b> | <b>P&lt;0.050</b> |
|-------------------|----------------------|----------|----------|-------------------|
| GFP vs. WT        | 20.823               | 0.645    | 0.892    | No                |
| GFP vs. S-A       | 11.333               | 0.351    | 0.926    | No                |
| S-A vs. WT        | 9.490                | 0.294    | 0.926    | No                |

Comparisons for factor: **cDNA within miR-Sec22b**

| <b>Comparison</b> | <b>Diff of Means</b> | <b>t</b> | <b>P</b> | <b>P&lt;0.050</b> |
|-------------------|----------------------|----------|----------|-------------------|
| GFP vs. WT        | 133.521              | 4.139    | <0.001   | Yes               |
| GFP vs. S-A       | 100.863              | 3.127    | 0.008    | Yes               |
| S-A vs. WT        | 32.658               | 1.012    | 0.319    | No                |

Comparisons for factor: **miR within GFP**

| <b>Comparison</b>     | <b>Diff of Means</b> | <b>t</b> | <b>P</b> | <b>P&lt;0.050</b> |
|-----------------------|----------------------|----------|----------|-------------------|
| miR-Sec22b vs. miR-NC | 155.746              | 4.828    | <0.001   | Yes               |

Comparisons for factor: **miR within WT**

| <b>Comparison</b>     | <b>Diff of Means</b> | <b>t</b> | <b>P</b> | <b>P&lt;0.050</b> |
|-----------------------|----------------------|----------|----------|-------------------|
| miR-Sec22b vs. miR-NC | 43.048               | 1.334    | 0.192    | No                |

Comparisons for factor: **miR within S-A**

| <b>Comparison</b>     | <b>Diff of Means</b> | <b>t</b> | <b>P</b> | <b>P&lt;0.050</b> |
|-----------------------|----------------------|----------|----------|-------------------|
| miR-Sec22b vs. miR-NC | 66.215               | 2.053    | 0.049    | Yes               |

#### **Fig. 4q serum Cit**

Comparisons for factor: **cDNA within miR-NC**

| <b>Comparison</b> | <b>Diff of Means</b> | <b>t</b> | <b>P</b> | <b>P&lt;0.050</b> |
|-------------------|----------------------|----------|----------|-------------------|
| WT vs. GFP        | 4.732                | 0.691    | 0.871    | No                |
| WT vs. S-A        | 3.592                | 0.524    | 0.871    | No                |
| S-A vs. GFP       | 1.140                | 0.166    | 0.871    | No                |

Comparisons for factor: **cDNA within miR-Sec22b**

| <b>Comparison</b> | <b>Diff of Means</b> | <b>t</b> | <b>P</b> | <b>P&lt;0.050</b> |
|-------------------|----------------------|----------|----------|-------------------|
| GFP vs. WT        | 30.765               | 4.490    | <0.001   | Yes               |
| S-A vs. WT        | 16.850               | 2.459    | 0.039    | Yes               |
| GFP vs. S-A       | 13.916               | 2.031    | 0.051    | No                |



Comparisons for factor: **miR within GFP**

| Comparison            | Diff of Means | t     | P      | P<0.050 |
|-----------------------|---------------|-------|--------|---------|
| miR-Sec22b vs. miR-NC | 43.141        | 6.297 | <0.001 | Yes     |

Comparisons for factor: **miR within WT**

| Comparison            | Diff of Means | t     | P     | P<0.050 |
|-----------------------|---------------|-------|-------|---------|
| miR-Sec22b vs. miR-NC | 7.643         | 1.116 | 0.273 | No      |

Comparisons for factor: **miR within S-A**

| Comparison            | Diff of Means | t     | P      | P<0.050 |
|-----------------------|---------------|-------|--------|---------|
| miR-Sec22b vs. miR-NC | 28.085        | 4.099 | <0.001 | Yes     |

**Fig. 4r serum Val**

Comparisons for factor: **cDNA within miR-NC**

| Comparison  | Diff of Means | t      | P     | P<0.050 |
|-------------|---------------|--------|-------|---------|
| WT vs. S-A  | 3.808         | 0.159  | 0.998 | No      |
| GFP vs. S-A | 3.554         | 0.148  | 0.998 | No      |
| WT vs. GFP  | 0.254         | 0.0106 | 0.998 | No      |

Comparisons for factor: **cDNA within miR-Sec22b**

| Comparison  | Diff of Means | t     | P      | P<0.050 |
|-------------|---------------|-------|--------|---------|
| GFP vs. WT  | 100.299       | 4.184 | <0.001 | Yes     |
| S-A vs. WT  | 63.765        | 2.660 | 0.025  | Yes     |
| GFP vs. S-A | 36.533        | 1.524 | 0.138  | No      |

Comparisons for factor: **miR within GFP**

| Comparison            | Diff of Means | t     | P      | P<0.050 |
|-----------------------|---------------|-------|--------|---------|
| miR-Sec22b vs. miR-NC | 128.324       | 5.353 | <0.001 | Yes     |

Comparisons for factor: **miR within WT**

| Comparison            | Diff of Means | t     | P     | P<0.050 |
|-----------------------|---------------|-------|-------|---------|
| miR-Sec22b vs. miR-NC | 27.771        | 1.158 | 0.256 | No      |

Comparisons for factor: **miR within S-A**

| Comparison            | Diff of Means | t     | P      | P<0.050 |
|-----------------------|---------------|-------|--------|---------|
| miR-Sec22b vs. miR-NC | 95.344        | 3.977 | <0.001 | Yes     |

**Fig. 4s serum Leu/Ile**

Comparisons for factor: **cDNA within miR-NC**

| Comparison  | Diff of Means | t      | P     | P<0.050 |
|-------------|---------------|--------|-------|---------|
| GFP vs. WT  | 4.464         | 0.130  | 0.999 | No      |
| S-A vs. WT  | 2.512         | 0.0732 | 0.999 | No      |
| GFP vs. S-A | 1.952         | 0.0569 | 0.999 | No      |

Comparisons for factor: **cDNA within miR-Sec22b**

| Comparison | Diff of Means | t     | P     | P<0.050 |
|------------|---------------|-------|-------|---------|
| GFP vs. WT | 130.000       | 3.791 | 0.002 | Yes     |
| S-A vs. WT | 89.152        | 2.600 | 0.028 | Yes     |

|             |        |       |       |    |
|-------------|--------|-------|-------|----|
| GFP vs. S-A | 40.848 | 1.191 | 0.243 | No |
|-------------|--------|-------|-------|----|

Comparisons for factor: **miR within GFP**

| Comparison            | Diff of Means | t     | P      | P<0.050 |
|-----------------------|---------------|-------|--------|---------|
| miR-Sec22b vs. miR-NC | 155.888       | 4.546 | <0.001 | Yes     |

Comparisons for factor: **miR within WT**

| Comparison            | Diff of Means | t     | P     | P<0.050 |
|-----------------------|---------------|-------|-------|---------|
| miR-Sec22b vs. miR-NC | 30.352        | 0.885 | 0.383 | No      |

Comparisons for factor: **miR within S-A**

| Comparison            | Diff of Means | t     | P     | P<0.050 |
|-----------------------|---------------|-------|-------|---------|
| miR-Sec22b vs. miR-NC | 116.992       | 3.411 | 0.002 | Yes     |

#### **Fig. 4t liver TG**

Comparisons for factor: **cDNA within miR-NC**

| Comparison  | Diff of Means | t     | P     | P<0.050 |
|-------------|---------------|-------|-------|---------|
| GFP vs. WT  | 5.091         | 2.262 | 0.091 | No      |
| GFP vs. S-A | 3.172         | 1.409 | 0.310 | No      |
| S-A vs. WT  | 1.919         | 0.853 | 0.401 | No      |

Comparisons for factor: **cDNA within miR-Sec22b**

| Comparison  | Diff of Means | t      | P      | P<0.050 |
|-------------|---------------|--------|--------|---------|
| GFP vs. S-A | 29.173        | 12.960 | <0.001 | Yes     |
| GFP vs. WT  | 27.469        | 12.203 | <0.001 | Yes     |
| WT vs. S-A  | 1.704         | 0.757  | 0.455  | No      |

Comparisons for factor: **miR within GFP**

| Comparison            | Diff of Means | t      | P      | P<0.050 |
|-----------------------|---------------|--------|--------|---------|
| miR-Sec22b vs. miR-NC | 26.933        | 11.964 | <0.001 | Yes     |

Comparisons for factor: **miR within WT**

| Comparison            | Diff of Means | t     | P     | P<0.050 |
|-----------------------|---------------|-------|-------|---------|
| miR-Sec22b vs. miR-NC | 4.554         | 2.023 | 0.052 | No      |

Comparisons for factor: **miR within S-A**

| Comparison            | Diff of Means | t     | P  | P<0.050 |
|-----------------------|---------------|-------|----|---------|
| miR-Sec22b vs. miR-NC | 0.931 0.413   | 0.682 | No | No      |

#### **Fig. 4u serum TG**

Comparisons for factor: **cDNA within miR-NC**

| Comparison  | Diff of Means | t     | P     | P<0.050 |
|-------------|---------------|-------|-------|---------|
| WT vs. GFP  | 0.452         | 1.505 | 0.370 | No      |
| S-A vs. GFP | 0.276         | 0.921 | 0.596 | No      |
| WT vs. S-A  | 0.175         | 0.585 | 0.563 | No      |

Comparisons for factor: **cDNA within miR-Sec22b**

| Comparison | Diff of Means | t | P | P<0.050 |
|------------|---------------|---|---|---------|
|------------|---------------|---|---|---------|

|             |       |       |        |     |
|-------------|-------|-------|--------|-----|
| S-A vs. GFP | 1.916 | 6.387 | <0.001 | Yes |
| S-A vs. WT  | 1.144 | 3.815 | 0.001  | Yes |
| WT vs. GFP  | 0.771 | 2.572 | 0.015  | Yes |

Comparisons for factor: **miR within GFP**

| <b>Comparison</b>     | <b>Diff of Means</b> | <b>t</b> | <b>P</b> | <b>P&lt;0.050</b> |
|-----------------------|----------------------|----------|----------|-------------------|
| miR-NC vs. miR-Sec22b | 0.125                | 0.418    | 0.679    | No                |

Comparisons for factor: **miR within WT**

| <b>Comparison</b>     | <b>Diff of Means</b> | <b>t</b> | <b>P</b> | <b>P&lt;0.050</b> |
|-----------------------|----------------------|----------|----------|-------------------|
| miR-Sec22b vs. miR-NC | 0.194                | 0.648    | 0.522    | No                |

Comparisons for factor: **miR within S-A**

| <b>Comparison</b>     | <b>Diff of Means</b> | <b>t</b> | <b>P</b> | <b>P&lt;0.050</b> |
|-----------------------|----------------------|----------|----------|-------------------|
| miR-Sec22b vs. miR-NC | 1.514                | 5.048    | <0.001   | Yes               |
